# Supplementary material for: Groundwater salinity variation in Upazila Assasuni (southwestern Bangladesh), as steered by surface clay layer thickness, relative elevation and present-day land use
Source: Copernicus journal article supplement (doi:10.5194/hess-23-1431-2019), 2019-03-14
Supplement: Supplementary file 1 [file Supplementary material.xlsx]

## Sheet: Water sample composition
Distance along transect (m)	Sample name	Sample data	lat	long	Depth (m)	EC	pH	Cl mg/l	HCO3 mg/l	SO42- mg/l	Na mg/l	Ca mg/l	Mg mg/l	K mg/l	Tritium range Bq/l	δ18O‰	δ2H‰	Isotope class	Saturation index Calcite	PCO2
30	A148	2017-02-04	22.5581	89.1715	42.7	3511	6.6	644	550	0.2	361	208	68.1	9.6					0.1	-0.8
30	A171	2017-02-04	22.5582	89.1717	36.6	4214	6.5	762	800	12.7	463	224	75	11.3		-7.2	-46.8	Light	0.2	-0.6
820	A193	2017-07-25	22.5581	89.162	40.2	4440	6.8	1420	770	136.5	732	187	114.3	22.9		-6.5	-41.7	Light	0.3	-0.9
1910	A191	2017-07-23	22.5507	89.1534	17.4	11350	6.5	4188	940	74.8	2231	220	293.6	56.3	0.94 - 1.98	-3.1	-22.4	Evap	0	-0.6
2252	A33	2017-01-16	22.548	89.1524	16.8	8306	7.4	2870	575	189	1618	205	189.6	16.9					0.7	-1.7
2288	A34	2017-01-16	22.5477	89.1513	16.8	11380	7.1	4100	510	567	2089	408	312.4	14.8					0.6	-1.5
2418	A168	2017-01-30	22.5462	89.1529	24.4	6458	6.7	1590	560	15	718	281	132.7	15		-4.4	-26.2	Middle	0.2	-0.9
2418	A169	2017-01-30	22.5462	89.1529	36.6	7340	6.7	1870	480	1	919	248	115.9	14.4		-4.9	-29.8	Middle	0.1	-1
2418	A170	2017-01-30	22.5462	89.1529	12.2	7660	6.8	2000	320	38.5	1182	142	72.7	10.9	-0.88	-1.4	-10.1	Evap	-0.2	-1.3
2476	A32	2017-01-16	22.5457	89.1521	21.3	4024	7.5	1510	460	57.9	941	139	54.6	7.4					0.6	-1.8
2506	A166	2017-01-30	22.5454	89.1528	13.7	6116	6.7	1500	410	73.8	739	270	86.2	8.5	0.02 - 0.98	-4.5	-25.9	Middle	0.1	-1.1
2506	A167	2017-01-30	22.5454	89.1528	45.7	7660	6.7	1920	550	1.4	1009	237	105.2	14.4		-3	-15.4	Heavy	0.1	-0.9
2526	A30	2017-01-16	22.5451	89.1529	19.8	3624	7	1050	450	9.1	393	276	95.2	9.6					0.5	-1.3
2538	A28	2017-01-16	22.5451	89.1526	13.7	3818	6.9	883	420	28.1	552	136	47.1	6.6	-0.98	-2.9	-19.5	Evap	0.1	-1.2
2551	A31	2017-01-16	22.5449	89.153	16.8	3601	7.2	1080	490	21.4	410	302	96.8	8.9					0.7	-1.5
2551	A29	2017-01-16	22.5449	89.1528	13.7	3835	6.8	874	560	19.8	406	224	74.9	7.6					0.3	-1
2559	A163	2017-01-30	22.5448	89.1527	12.2	5735	6.5	1380	480	60	431	420	134.2	12.3	-0.96	-4.3	-25.6	Middle	0.1	-0.8
2559	A164	2017-01-30	22.5448	89.1527	36.6	7708	6.6	1970	480	1.3	1038	235	118.3	13.5		-4.7	-26.4	Middle	0	-0.9
2559	A165	2017-01-30	22.5448	89.1527	24.4	5430	6.7	1260	540	20.2	709	204	72.2	9.9		-3.6	-21.4	Heavy	0.1	-1
2563	A27	2017-01-16	22.5448	89.1527	15.2	3101	6.8	936	630	36.8	414	251	85.2	9.1	-0.98	-4.1	-27	Middle	0.4	-1
2610	A26	2017-01-16	22.5443	89.1527	22.9	1434	6.9	295	430	0.1	56	193	60.1	4.8					0.3	-1.3
2614	A126	2017-01-31	22.5443	89.1526	33.5	5633	6.6	1330	510	2.2	644	223	87.6	8.9					0.1	-0.9
2651	A24	2017-01-16	22.5439	89.1531	19.8	4129	6.8	930	480	102	309	326	93.3	5.8					0.4	-1.1
2653	A23	2017-01-16	22.5439	89.1525	13.7	1711	6.8	304	370	0.2	173	100	26.1	2.5					-0.1	-1.2
2664	A25	2017-01-16	22.5438	89.1529	16.8	1109	6.9	113	620	0.3	110	99	30.8	2.8		-3.8	-22.7	Heavy	0.2	-1
2669	A162	2017-01-30	22.5437	89.1528	12.2	1384	6.9	122	700	1.3	153	81	25.6	3.4	0.23 - 1.21	-3.7	-22.3	Heavy	0.1	-1
2726	A22	2017-01-16	22.5432	89.1523	13.7	1190	6.9	135	620	14.1	109	125	33.6	2.1		-3.6	-20.5	Heavy	0.3	-1.1
2734	A35	2017-01-16	22.5432	89.1516	16.8	1109	7.3	84	600	16.2	111	105	22.4	1.2					0.6	-1.5
2747	A140	2017-02-03	22.543	89.1527	19.8	2137	6.4	368	440	0.1	68	211	63.3	3.3					-0.2	-0.7
2748	A142	2017-02-03	22.5429	89.1528	16.8	1966	6.6	275	520	23.6	110	202	44.9	2					0.1	-0.8
2758	A141	2017-02-03	22.5428	89.1532	13.7	1520	6.5	172	510	0.1	35	170	48.3	3					-0.1	-0.7
2766	A21	2017-01-16	22.5428	89.1523	13.7	812	6.7	31	510	0.3	27	107	31.3	1.6					0	-1
2793	A36	2017-01-16	22.5424	89.1535	12.2	2655	7	892	590	55.5	496	252	56.8	3.3					0.6	-1.2
2802	A37	2017-01-16	22.5423	89.1535	12.2	2385	7	877	470	65.8	392	266	60.3	3					0.5	-1.4
2819	A43	2017-01-16	22.5422	89.1528	13.7	939	7.1	130	520	4.4	96	118	35.3	15.5					0.4	-1.3
2823	A38	2017-01-16	22.5421	89.1534	12.2	1804	7.2	409	530	16.2	175	208	48.9	2.1					0.7	-1.4
2823	A40	2017-01-16	22.5421	89.153	13.1	1219	6.7	235	550	10.9	72	193	41.6	5					0.3	-1
2838	A41	2017-01-16	22.542	89.1526	13.7	871	7.2	76	480	0.1	58	120	38.4	5					0.5	-1.4
2840	A127	2017-02-01	22.5421	89.1521	13.7	892	6.6	29	495	0.2	13	102	28	2.2	0.21 - 1.19	-4.2	-27.9	Middle	-0.2	-0.8
2849	A42	2017-01-16	22.542	89.1523	16.8	1098	6.9	19	500	0.1	13	107	29.3	2.6					0.2	-1.2
2850	A39	2017-01-16	22.5419	89.1533	15.2	2040	6.9	836	320	3	293	241	56.1	5.1					0.2	-1.4
2869	A138	2017-02-03	22.5418	89.1523	25.9	841	6.5	45	360	0.1	11	89	33.7	2.6					-0.4	-0.9
2871	A159	2017-01-30	22.5418	89.1521	24.4	1020	6.9	53	450	0.7	31	107	31.6	3	0.68 - 1.7	-4.7	-29.5	Middle	0.1	-1.2
2871	A160	2017-01-30	22.5418	89.1521	36.6	3793	6.4	852	380	1.3	268	296	87.4	5.8	-0.96	-5.2	-33.4	Middle	-0.1	-0.8
2871	A161	2017-01-30	22.5418	89.1521	7.6	1034	6.8	48	470	1.9	21	106	30.4	1.7	-0.98	-4.3	-27	Middle	0	-1
2915	A52	2017-01-19	22.5413	89.1524	18.3	810	7	89	450	1.8	46	113	27.5	5.6					0.3	-1.3
2923	A53	2017-01-19	22.5412	89.1527	13.7	670	7	21	400	0.1	22	95	28.4	3.9					0.2	-1.4
2934	A54	2017-01-19	22.5412	89.1518	16.8	670	7	28	450	0.1	18	96	29.8	3.7					0.1	-1.2
3001	A56	2017-01-19	22.5406	89.1506	12.8	1358	6.9	164	660	27.6	80	186	50.6	2.6					0.5	-1
3002	A57	2017-01-19	22.5406	89.1507	10.7	658	7	29	360	0.2	25	95	26.4	3.6					0.1	-1.4
3024	A55	2017-01-19	22.5403	89.151	12.2	1126	6.9	155	480	22.1	68	168	37	2.6					0.3	-1.1
3036	A137	2017-02-03	22.5401	89.1521	16.8	1143	6.6	96	470	0	20	130	33.6	1.7					-0.1	-0.9
3039	A158	2017-01-30	22.5401	89.1519	10.7	2478	6.4	482	390	35.4	75	292	41.9	9.9	0.19 - 1.17	-4.2	-25.7	Middle	-0.1	-0.8
3042	A124	2017-01-30	22.5401	89.1519	13.7	1451	6.5	261	440	5.8	53	193	26.1	10.5					0	-0.9
3105	A136	2017-02-03	22.5395	89.1513	13.7	1326	6.7	119	580	37.7	88	124	28.7	8.4					0.1	-0.9
3115	A135	2017-02-03	22.5392	89.1528	16.8	1042	6.7	81	460	0.2	48	95	25.5	8.1					-0.1	-1
3116	A125	2017-01-30	22.5393	89.1517	13.7	1074	6.7	84	540	0.1	66	105	36.2	14.4					-0.1	-0.9
3130	A145	2017-02-04	22.5392	89.1516	7.6	6240	6.4	1450	580	157	738	320	97.9	14.7	-1.06	-0.5	-9.8	Evap	0	-0.7
3130	A146	2017-02-04	22.5392	89.1516	36.6	4036	6.4	962	450	4.4	251	342	95.3	9.2		-4.7	-30.4	Middle	0	-0.8
3130	A147	2017-02-04	22.5392	89.1516	24.4	1640	6.6	220	510	5.9	65	153	46.6	10.8	0.33 - 1.33	-4.4	-27.7	Middle	0	-0.9
3145	A61	2017-01-19	22.5392	89.1505	7.6	5576	6.9	1830	490	166	690	471	131.6	4.2	0.33 - 1.33	-3.5	-25	Evap	0.5	-1.2
3170	A156	2017-01-30	22.5388	89.1521	36.6	4645	6.6	1180	430	6.3	312	420	105	10.4					0.2	-0.9
3170	A157	2017-01-30	22.5388	89.1521	24.4	1346	6.7	114	480	2.9	42	139	37.1	6					0	-0.9
3211	A155	2017-01-30	22.5383	89.1523	9.1	6558	6.3	1490	770	117	614	438	141.1	12.3					0.1	-0.4
3243	A122	2017-01-24	22.538	89.1526	12.2	1244	6.8	146	480	19.3	65	169	33.2	2.2					0.2	-1.1
3263	A123	2017-01-24	22.5378	89.1521	12.2	802	6.9	72	440	1.4	47	113	24.4	2.3					0.1	-1.2
3306	A121	2017-01-24	22.5373	89.1526	15.2	862	6.9	60	400	0.1	33	126	24.4	2.8					0.1	-1.2
3313	A132	2017-02-03	22.5373	89.152	9.1	1099	6.7	75	430	0.1	56	115	23.5	3					-0.1	-1
3328	A120	2017-01-24	22.5371	89.1526	13.7	848	6.9	44	490	4.9	54	101	24.9	3.8					0.1	-1.1
3347	A133	2017-02-03	22.537	89.1518	13.7	1230	6.7	120	470	27	69	107	33.7	3.1					-0.1	-0.9
3347	A154	2017-01-30	22.537	89.1523	9.1	950	6.8	24	420	7.8	16	86	49	6.6					-0.1	-1.1
3366	A119	2017-01-24	22.5367	89.1528	13.7	755	7	50	320	17.5	21	95	28.3	22.8					0.1	-1.4
3413	A118	2017-01-24	22.5362	89.153	22.9	890	7.1	77	400	8.9	52	117	21.3	2					0.3	-1.4
3422	A117	2017-01-24	22.5361	89.1528	10.7	720	7	20	430	3.1	38	101	18.4	2.3					0.2	-1.3
3444	A116	2017-01-24	22.536	89.1522	13.7	505	7	23	240	0.6	13	70	17.5	2.9					-0.2	-1.6
3540	A114	2017-01-24	22.5351	89.1515	16.8	994	6.9	84	450	7.2	56	126	27.7	5.9					0.2	-1.2
3545	A115	2017-01-24	22.535	89.1524	18.3	775	7	55	470	0.2	43	112	20.5	2.9					0.3	-1.3
3553	A152	2017-01-30	22.5349	89.1517	22.9	4161	6.2	1020	390	1.1	181	449	79	8.9					-0.2	-0.6
3553	A153	2017-01-30	22.5349	89.1517	6.1	898	6.8	61	380	1.6	50	65	32.2	7	0.5 - 1.52	-3	-23.2	Evap	-0.3	-1.1
3571	A131	2017-02-03	22.5347	89.1523	18.3	1070	6.6	108	625	2.5	55	148	29.3	4.1					0.1	-0.8
3577	A113	2017-01-24	22.5347	89.1515	10.7	1050	7	123	510	0.7	59	144	31.2	5	0.19 - 1.17	-4.6	-29	Middle	0.3	-1.2
3657	A112	2017-01-24	22.5338	89.1523	16.8	1410	7	215	500	0.4	81	187	32.5	4.1					0.4	-1.2
3715	A111	2017-01-24	22.5333	89.1515	13.7	2450	6.6	627	390	1.4	218	212	51.6	6.1	0.29 - 1.29	-3	-20.9	Evap	-0.1	-0.9
3770	A108	2017-01-24	22.5328	89.1514	19.8	4023	7	1230	330	46.7	411	318	82.5	6.8		-0.9	-10.3	Evap	0.4	-1.5
3784	A150	2017-01-30	22.5327	89.1509	13.7	7753	6.4	1990	390	14.2	855	374	107.9	10	0.28 - 1.26	-5.6	-37.7	Light	-0.1	-0.8
3784	A151	2017-01-30	22.5327	89.1509	9.1	21260	6	5880	270	685	3116	643	266.5	15.2	0.68 - 1.7	3.2	7.3	Evap	-0.6	-0.7
3950	A172	2017-02-04	22.5314	89.1501	15.2	5555	6.4	1370	430	18.3	440	379	113.3	11.7		-5.7	-35.9	Light	0	-0.8
4341	A194	2017-07-25	22.5291	89.1476	7	8100	7.1	2982	720	183.5	1281	419	180.7	13.1		-1.7	-14.9	Evap	0.8	-1.3
4680	A195	2017-07-25	22.5265	89.1455	6.4	11930	7	4546	520	491.6	2379	222	275.1	55.3		-0.1	-5.3	Evap	0.2	-1.3
6385	A196	2017-07-25	22.5147	89.1331	37.5	3570	6.7	938	1605	34.3	555	178	78.4	12.6		-6.2	-38	Light	0.5	-0.5
	A44	2017-01-17	22.5427	89.1544	18.3	1635	6.8	392	370	0.6	155	157	43.7	3.9					0.1	-1.2
	A45	2017-01-17	22.5421	89.1562	21.3	4205	6.8	1590	540	15.1	595	319	117.2	17.5					0.3	-1
	A46	2017-01-17	22.5419	89.1579	10.7	7783	7	2550	390	321	1306	282	182.3	8.2					0.3	-1.4
	A47	2017-01-17	22.543	89.1502	18.3	927	7.3	135	450	3.5	40	140	41.7	3.2					0.6	-1.6
	A58	2017-01-19	22.5399	89.1503	21.3	808	7	63	440	0.1	26	121	33.1	3.3					0.3	-1.3
	A59	2017-01-19	22.5393	89.15	15.2	4287	6.9	1490	430	135	462	487	112.2	2.9					0.5	-1.2
	A60	2017-01-19	22.5393	89.1502	13.7	1100	7.2	189	530	0.7	39	161	42.7	3.1					0.6	-1.4
	A109	2017-01-24	22.532	89.1535	22.9	1965	6.8	419	550	0.1	161	215	41.8	5.8					0.3	-1
	A110	2017-01-24	22.5333	89.1489	24.4	10870	6.6	3430	330	409	1947	267	152.1	17.4					-0.2	-1.1
	A192	2017-07-24	22.5356	89.1601	7.9	10970	6.8	4139	680	406	2002	343	294.7	40.3		-0.2	-7	Evap	0.4	-1
	AFN23	2016-06-03	22.526	89.1573	145.9	958	7.7	146	401	0.4	187	22	18	4.7					0.2	-2
Hand auger water samples:
2451	A51B	2017-01-17	22.5459	89.153	2	5210	7.3	2280	320	75.4	923	317	169	4.9					0.6	-1.8
2503	A176B	2017-02-10	22.5454	89.1527	2.1	13110	5.9	3700	220	175	1691	396	290.5	8.3					-0.9	-0.6
2558	A180B	2017-02-10	22.5448	89.1527	3.2	5799	6.1	1570	570	118	555	423	168.3	10.2					-0.2	-0.4
2797	A49B	2017-01-16	22.5424	89.1532	3	816	7.2	105	420	10.9	83	96	32.3	1.6					0.4	-1.6
2797	A50B	2017-01-16	22.5424	89.1532	5.2	827	7.4	105	490	8.2	84	108	35	0.9					0.6	-1.6
2867	A203	2017-07-27	22.5418	89.1519	1.5	1110	6.5	53	520	38.1	36	175	45.5	1.4	0.75 - 1.77	-5.8	-35.4	Light	0	-0.7
2871	A177B	2017-02-10	22.5418	89.1521	3	1131	6.3	63	420	16.3	24	138	41.7	2.3					-0.4	-0.6
3094	A179B	2017-02-10	22.5396	89.1517	3.3	2108	6.4	324	600	129	204	156	62.1	15.7					-0.2	-0.6
3131	A178B	2017-02-10	22.5392	89.1517	2.7	13020	6.3	3150	720	654	2037	218	227.8	37.8					-0.3	-0.5
3140	A204	2017-07-27	22.5391	89.1517	1.5	12820	6.7	4640	850	947.6	2352	449	396	22.5	-0.9	-1.8	-11.7	Evap	0.4	-0.8
3785	A205	2017-07-27	22.5327	89.1509	1.5	12600	7.1	4510	640	1180.5	2532	406	319.3	73.9	-0.98	-4.2	-26.9	Middle	0.6	-1.3
Surface water samples:
1910	A202	2017-07-26	22.5507	89.1535		12400	7.2	4789	190	629.8	2524	122	313	91.4		-4.7	-32.2	Middle	-0.3	-2
2501	A197	2017-07-26	22.5454	89.1527		850	6.8	204	120	5.5	116	29	15.9	4.8		-7	-48	Light	-1	-1.6
2520	A173	2017-02-10	22.5452	89.1528		2260	6.7	618	270	4.7	262	128	62.5	54					-0.3	-1.2
2572	A174	2017-02-10	22.5447	89.1526		1629	7.6	362	170	17.1	179	49	35.4	29.4					0.1	-2.3
2754	A143	2017-02-03	22.5429	89.1529		1398	7	305	290	13.8	94	75	34.9	19.3					-0.1	-1.5
2786	A139	2017-02-03	22.5426	89.1522		330	6.7	31	200	6.6	23	20	4.9	8.8					-1	-1.4
2786	A198	2017-07-26	22.5426	89.1521		250	7.5	37	110	6.1	23	17	3.8	8.6		-5	-34.6	Middle	-0.5	-2.4
2862	A62	2017-01-19	22.5417	89.1537		1946	8.4	665	140	17.2	185	175	57.1	3.7					1.2	-3.2
2911	A144	2017-02-03	22.5414	89.1521		380	6.9	46	160	4.5	42	11	4.6	10.5					-1.2	-1.6
3134	A175	2017-02-10	22.5392	89.1517		1541	7.5	345	290	88.3	189	67	44	18.8					0.3	-2
3174	A134	2017-02-03	22.5387	89.1522		1731	7	289	280	90.5	153	76	42.9	33.4					-0.1	-1.5
3552	A129	2017-02-03	22.5349	89.1519		371	7	19	246	5.1	9	34	5.9	8.8					-0.4	-1.5
3552	A200	2017-07-26	22.535	89.1519		190	7	11	60	3.5	6	19	3.6	6.6		-6.8	-41.2	Light	-1.2	-2.1
3561	A130	2017-02-03	22.5349	89.1517		828	6.8	82	360	11.8	40	58	20.5	21.1					-0.3	-1.1
3784	A128	2017-02-03	22.5327	89.151		13450	7.4	3800	238	517	2141	134	275.6	67					0.1	-2.1
3950	A149	2017-02-05	22.5315	89.1502		13470	7.3	3610	410	429	2079	101	260.7	64.6					0.2	-1.7
3950	A199	2017-07-26	22.5318	89.1501		6830	7.4	2537	290	323	1369	74	159.4	47.4		-5.8	-38.9	Light	0	-1.9
4520	A201	2017-07-26	22.5283	89.146		10690	7.5	4046	160	525.4	2159	104	266.9	75.4		-4.5	-29.8	Middle	-0.1	-2.3
