# Supplementary material for: Groundwater salinity variation in Upazila Assasuni (southwestern Bangladesh), as steered by surface clay layer thickness, relative elevation and present-day land use
Source: Copernicus journal article supplement (doi:10.5194/hess-23-1431-2019), 2019-03-14
Supplement: Supplementary file [file hess-23-1431-2019-supplement-title-page.pdf › hess-23-1431-2019-supplement-title-page.pdf]

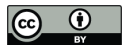

*Supplement of*

**Groundwater salinity variation in Upazila Assasuni  
(southwestern Bangladesh), as steered by surface clay layer  
thickness, relative elevation and present-day land use**

**Floris Loys Naus et al.**

*Correspondence to:* Floris Loys Naus (f.l.naus@uu.nl)

- [hess-23-1431-2019-supplement-title-page.pdf](#)
- [Supplementary material.xlsx](#)

The copyright of individual parts of the supplement might differ from the CC BY 4.0 License.
